# Supplementary material for: Visible light sensitized attapulgite-based lanthanide composites: microstructure, photophysical behaviour and biological application
Source: Royal Society of Chemistry journal article supplement (doi:10.1039/c1dt11364j), 2011-01-01
Supplement: c1dt11364j.pdf [file c1dt11364j.pdf]

## Supporting Information

### **Visible light sensitized attapulgite-based lanthanide composites: microstructure, photophysical behaviour and biological application**

Jun Xu,<sup>a</sup> Zhihong Sun,<sup>b</sup> Lei Jia,<sup>c</sup> Bo Li,<sup>b</sup> Long Zhao,<sup>a</sup> Xiao Liu,<sup>a</sup> Yufei Ma,<sup>a</sup> Hao Tian,<sup>a</sup> Qin Wang,<sup>b</sup> Weisheng Liu<sup>a</sup> and Yu Tang\*<sup>a</sup>

<sup>a</sup> Key Laboratory of Nonferrous Metal Chemistry and Resources Utilization of Gansu Province, State Key Laboratory of Applied Organic Chemistry and College of Chemistry and Chemical Engineering, Lanzhou University, Lanzhou, 730000 (P. R. China); <sup>b</sup> Institute of Cancer Biology and Drug Screening, School of Life Science, Lanzhou University, Lanzhou, 730000 (P. R. China); <sup>c</sup> Department of Physics and Chemistry, Henan Polytechnic University, Jiaozuo 454000 (P. R. China)

Fax: (+86) 931-891-2582

E-mail: [tangyu@lzu.edu.cn](mailto:tangyu@lzu.edu.cn)

**Table S1** Elemental Analysis of Matrix-APTES and Matrix-APMDES Samples

| Materials                | C (%) | H (%) | N (%) |
|--------------------------|-------|-------|-------|
| Atta-APTES               | 7.36  | 2.06  | 2.02  |
| Atta-APMDES              | 6.28  | 2.04  | 1.33  |
| SiO <sub>2</sub> -APTES  | 6.4   | 1.65  | 1.94  |
| SiO <sub>2</sub> -APMDES | 5.02  | 1.38  | 1.18  |

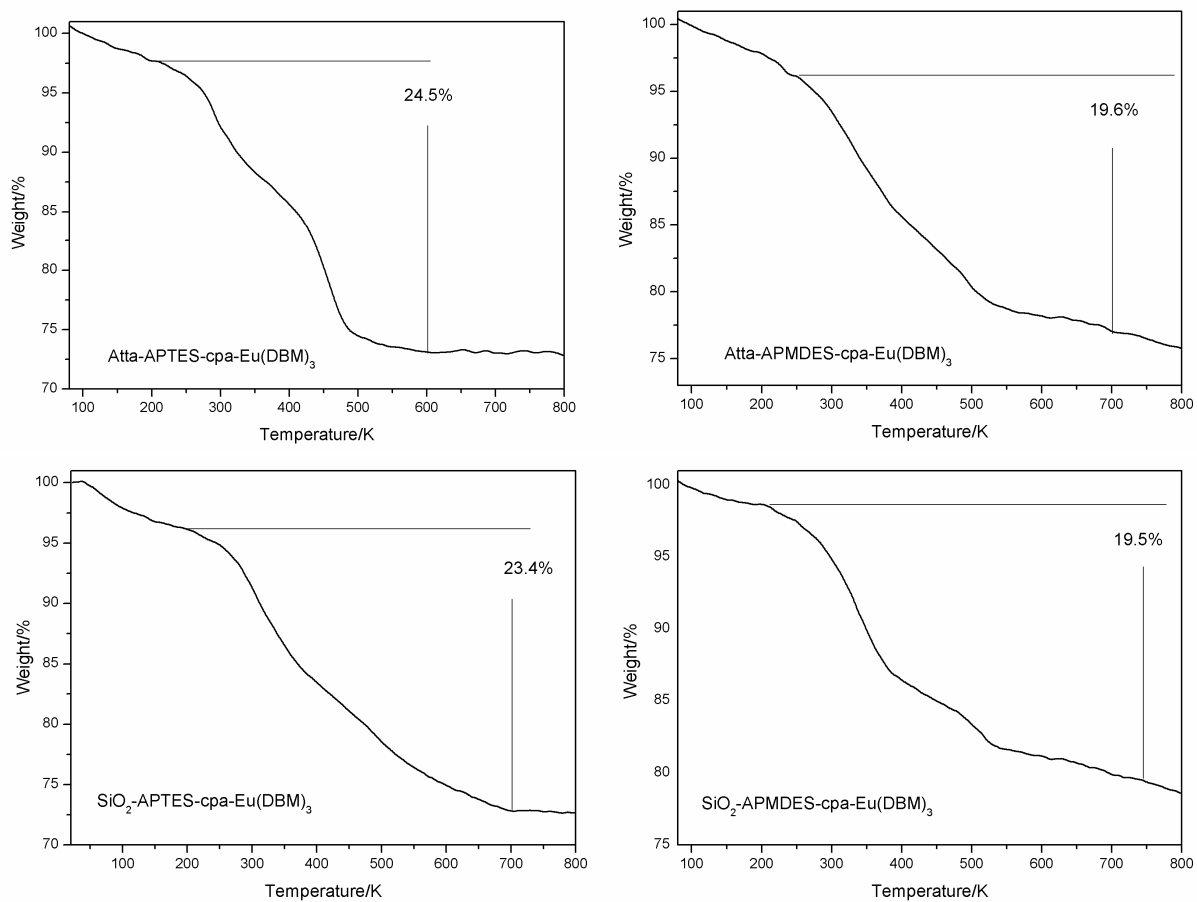

**Fig. S1** TG curves of Matrix-cpa-Eu(DBM)<sub>3</sub> samples.

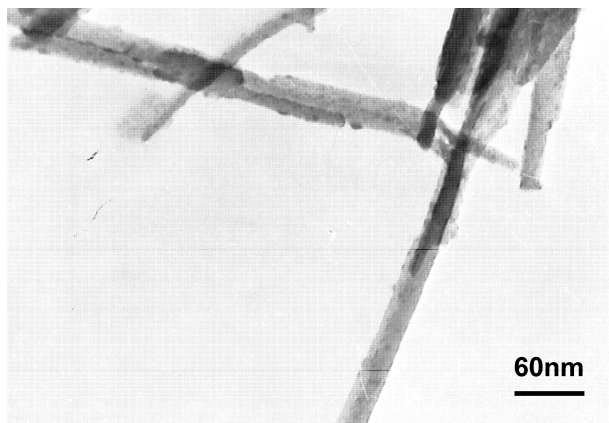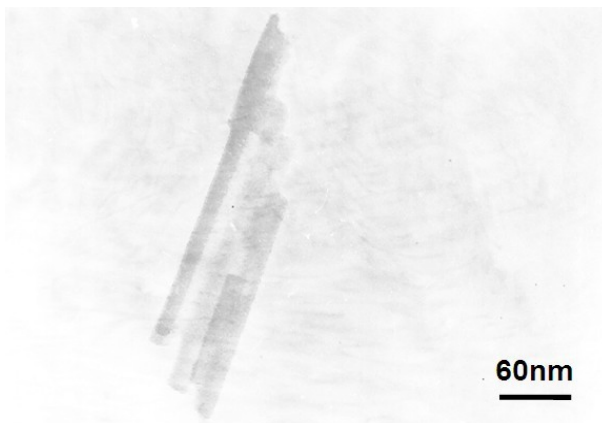

**Fig. S2** TEM images of Atta-APTES-cpa-Eu(DBM)<sub>3</sub>.

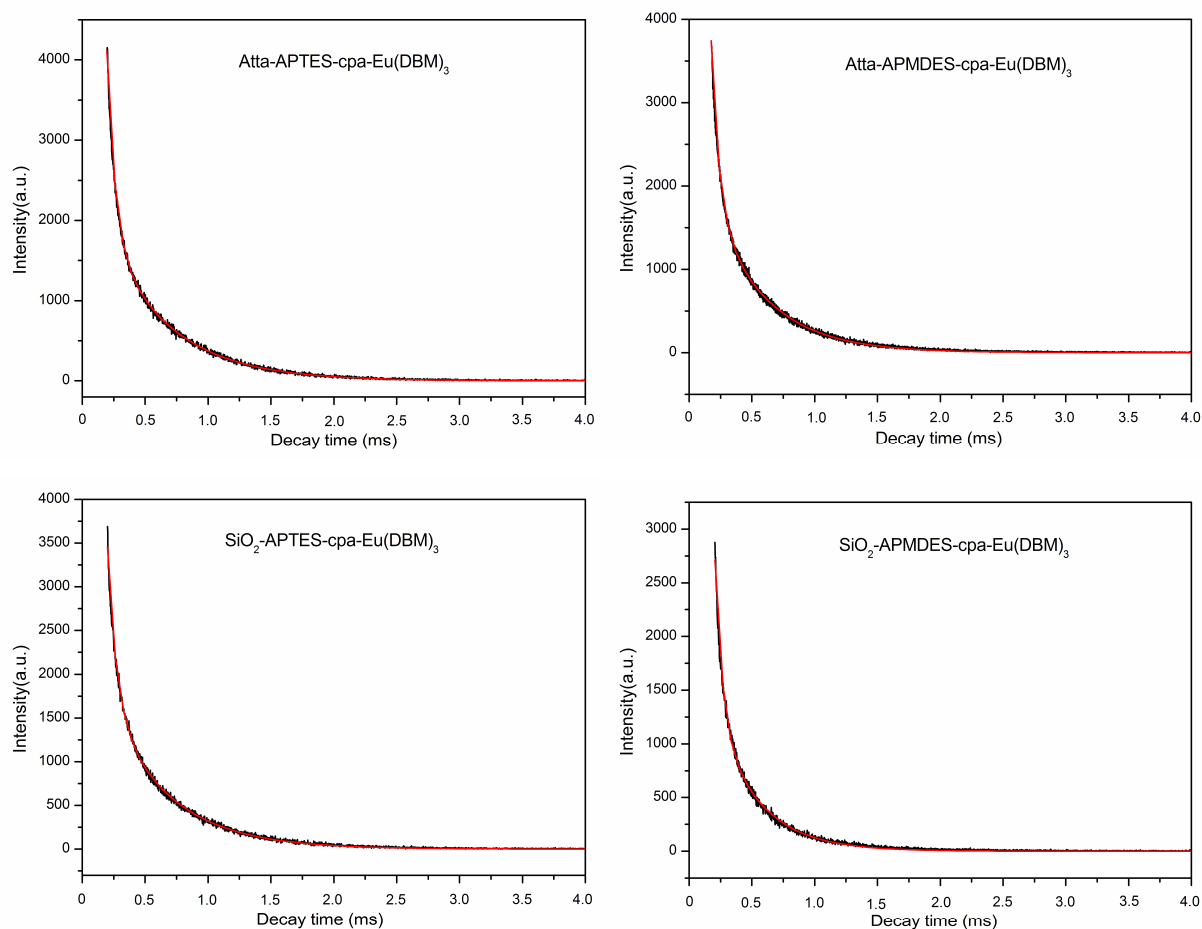

**Fig. S3** Luminescence decay curves of Matrix-cpa-Eu(DBM)<sub>3</sub> samples.

### Cell incubation and imaging

#### Cell culture:

HeLa cells ( $5 \times 10^5$  cells/mL) were maintained in Dulbecco's minimum Essential medium (DMEM Hyclone) supplemented with 10% fetal bovine serum (FBS, Gibco) and incubated in 5% CO<sub>2</sub> at 37 °C humidified atmosphere.

#### Cell bioimaging:

HeLa cells were plated in a flat-bottom 6-well plate (Costar) in 2mL culture medium and incubated in 5% CO<sub>2</sub> at 37 °C. After overnight incubation, the cells were treated with atta-based and silica-based composites with the end concentration 100 µg/mL for 1h and washed three times with phosphate buffered saline (PBS). Then the fluorescence imaging of cell membrane was observed under excitation at 340-380 nm (Zeiss Leica DM 4000B microscope).

#### Cell viability:

This was determined by (3-(4,5-dimethylthiazol-2-yl)-2,5-diphenyl-tetra-zolium bromide (MTT, Amresco 0793) assays on HeLa cells under normal physiological conditions (i.e., at pH 7.2–7.4). HeLa cells ( $1 \times 10^4$  cells/well) were plated in a flat-bottom 96-well plate (Costar) in 200µL culture medium and incubated overnight. Then the composites were added, with final concentrations of 25, 50, 75, 100, 125, 200 and 300 µg/mL. The plate was further incubated for 24 h and then the cells were washed with PBS three times. The MTT reagent (5 mg/mL) was then added to each well (20 µL/well) and incubated for 4h. Then the medium was removed and the absorbance was measured using a Perkin Elmer VICTOR<sup>3</sup> 1420 Multilabel Plate Reader at 490 nm. The relative cell viability (mean% ± SD, n = 3) was expressed as Abs composites/Abs control × 100%.
